# Supplementary material
Source: PubMed Central journal article supplement (PMC5736443)
Supplement: NIHMS916165-supplement-1.pdf [file NIHMS916165-supplement-1.pdf]

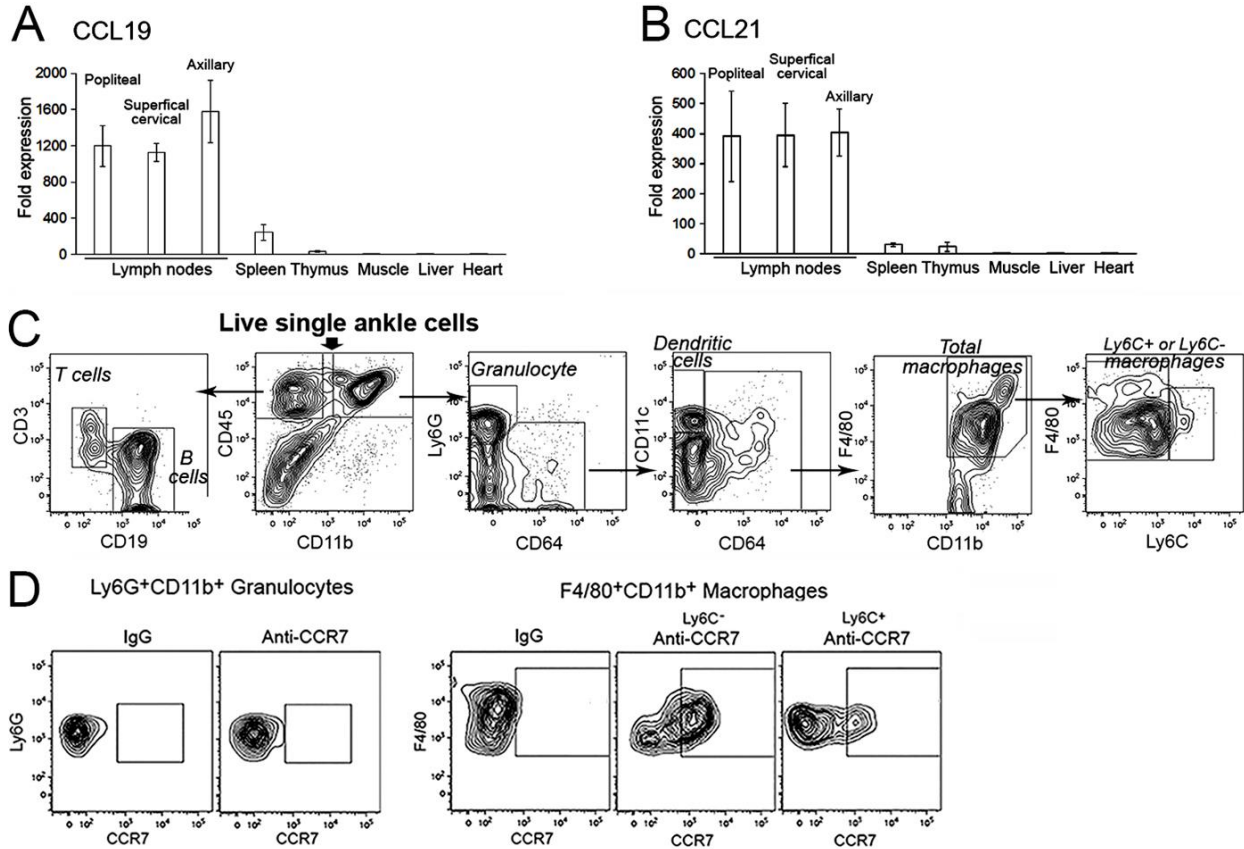

**Supplemental Figure 1: CCR7 on macrophages and ligand expression in control mice:**

(A) CCL19 and (B) CCL21 expression in mouse popliteal, superficial cervical, and axillary lymph nodes, as well as spleen, thymus, liver, skeletal and cardiac muscles were determined by qRT-PCR, expressed as fold expression of CCL19 and CCL21, normalized to cardiac muscle (n = 4 healthy C57BL/6 mice). (C) The gating strategy to characterize CD45<sup>+</sup> cells in the ankles of control mice by flow cytometry. The single live cells were first identified, followed by anti-CD45 staining to identify cells of hematopoietic origin. Total T cells, B cells, granulocytes, dendritic cells and total macrophages were then defined as indicated in Material and Methods. (D). The CCR7 expression on cells isolated from ankles of control mice were examined by flow cytometry. The CCR7 expressions on Ly6G<sup>+</sup> neutrophils, and Ly6C<sup>+</sup> or Ly6C<sup>-</sup> macrophages is presented.

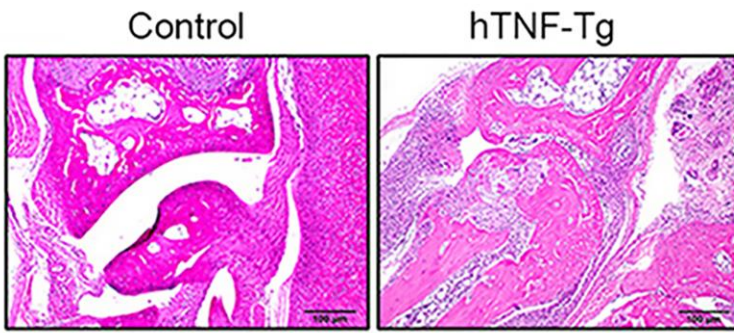

**Supplemental Figure 2:** The representative HE histology of ankle joints from 5 week old control or hTNF-Tg mice.

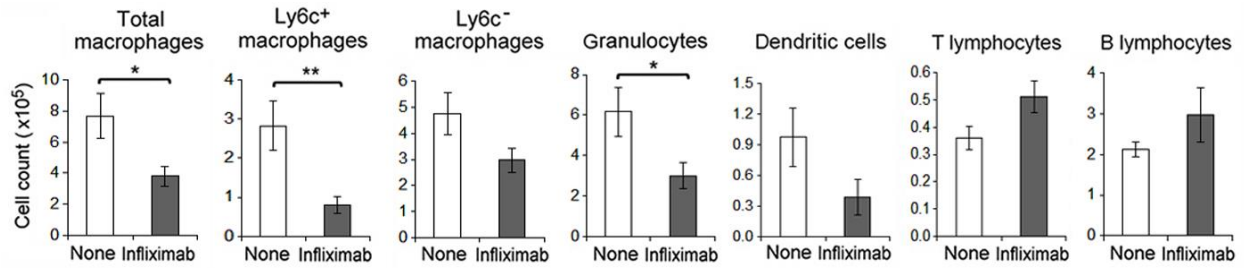

**Supplemental Figure 3: Reduction of macrophages and granulocytes in the ankles 7 days post initiation of infliximab treatment.** 5-6 week old hTNF-Tg mice with arthritis were treated with 2 doses of infliximab or vehicle control and the joints harvests 7 days after the initiation of therapy. Cell types were identified by flow cytometry as were defined in Supplemental Figure 2A (n = 6 for each group). \* represents  $p < 0.05$  and \*\*  $p < 0.01$  between the indicated groups.
